# Supplementary material for: A Basic Study of the Effects of Mulberry Leaf Administration to Healthy C57BL/6 Mice on Gut Microbiota and Metabolites
Source: MDPI journal article supplement (doi:10.3390/metabo13091003), 2023-09-10
Supplement: s1 [file s1]

## Supplementary Materials

Table S1. Average weekly weight of mice.

Table S2. Evaluation of the goodness of fit of the OPLS-DA models from the binning results.

Table S3. All *P* values of fecal metabolites between the control and MLP-treated groups.

Figure S1. Comparison of the relative abundance of each phylum between the groups at weeks 0 and 9. Data are presented as means  $\pm$  SEM, and statistical significance was evaluated by two-way ANOVA followed by Sidak's multiple comparison tests.  $P < 0.05$  was considered statistically significant.

Figure S2. PCA score plot of mouse feces from the control (black) and MLP-treated (red) groups at week 9. (Three Components,  $R^2X = 0.817$ ,  $Q^2 = 0.476$ ).

Figure S3. PLS-DA score plot of mouse feces k from the control (black) and MLP-treated (red) groups at week 9. (Two components,  $R^2X = 0.621$ ,  $R^2Y = 0.876$ ,  $Q^2 = 0.712$ ).

Figure S4. OPLS-DA score plot (A), loading plot (B), and VIP plot (C) of fecal samples from control (black) and MLP-treated (red) mice at week 9. (One Component,  $R^2X = 0.71$ ,  $R^2Y = 0.842$ ,  $Q^2 = 0.694$ ).

Figure S5. Time-course quantitative values of other metabolites in control (black line) and MLP-treated (red line) mouse feces. Values are presented as means  $\pm$  SEM. The asterisk indicates a significant difference between the control and MLP-treated groups ( $*P < 0.05$ ), and *P* values were calculated using the Student's *t*-test.

Table S1. Average weekly weight of mice.

| Time (weeks) | Body Weight (grams; mean $\pm$ standard deviation) |                   |
|--------------|----------------------------------------------------|-------------------|
|              | Control group                                      | MLP-treated group |
| 0            | 22.9 $\pm$ 0.5                                     | 22.0 $\pm$ 0.9    |
| 1            | 23.1 $\pm$ 0.5                                     | 22.2 $\pm$ 0.9    |
| 2            | 23.5 $\pm$ 0.5                                     | 22.5 $\pm$ 0.9    |
| 3            | 23.7 $\pm$ 0.6                                     | 22.7 $\pm$ 1.0    |
| 4            | 24.2 $\pm$ 0.6                                     | 23.0 $\pm$ 1.1    |
| 5            | 24.2 $\pm$ 0.6                                     | 23.1 $\pm$ 1.2    |
| 6            | 24.7 $\pm$ 0.6                                     | 23.5 $\pm$ 1.1    |
| 7            | 24.7 $\pm$ 0.7                                     | 23.7 $\pm$ 1.2    |
| 8            | 24.8 $\pm$ 0.8                                     | 24.0 $\pm$ 1.0    |
| 9            | 25.1 $\pm$ 0.8                                     | 24.1 $\pm$ 0.9    |

Table S2. Evaluation of the goodness of fit of OPLS-DA models from binning results.

| Week | R <sup>2</sup> X | R <sup>2</sup> Y | Q <sup>2</sup> | Number of Components |
|------|------------------|------------------|----------------|----------------------|
| 0    | 0.411            | 0.474            | -0.156         | 1+0+0                |
| 1    | 0.318            | 0.612            | -0.238         | 1+0+0                |
| 2    | 0.594            | 0.23             | -0.117         | 1+0+0                |
| 3    | 0.356            | 0.401            | -0.125         | 1+0+0                |
| 4    | 0.325            | 0.66             | 0.322          | 1+0+0                |
| 5    | 0.264            | 0.685            | 0.182          | 1+0+0                |
| 6    | 0.267            | 0.888            | 0.492          | 1+0+0                |
| 7    | 0.409            | 0.572            | 0.245          | 1+0+0                |
| 8    | 0.3              | 0.768            | 0.5            | 1+0+0                |
| 9    | 0.322            | 0.71             | 0.522          | 1+0+0                |

Table S3. All *P* values of fecal metabolites between the control and MLP-treated groups.

|                       | 0w    | 1w    | 2w    | 3w    | 4w    | 5w    | 6w    | 7w    | 8w    | 9w    |
|-----------------------|-------|-------|-------|-------|-------|-------|-------|-------|-------|-------|
| 2-Oxoglutarate        | 0.71  | 0.55  | 0.39  | 0.42  | 0.79  | 0.91  | 0.18  | 0.32  | 0.43  | 0.72  |
| 4-Hydroxybenzoate     | 0.07  | 0.38  | 0.07  | 0.59  | <0.05 | 0.60  | 0.60  | 0.65  | 0.14  | 0.36  |
| 4-Hydroxyphenylacetat | 0.57  | <0.05 | 0.99  | 0.16  | <0.1  | 0.19  | 0.71  | 0.48  | <0.1  | 0.18  |
| 5-Aminopentanoate     | 0.57  | 0.95  | 0.32  | 0.48  | 0.46  | 0.36  | 0.84  | 0.59  | 0.95  | 0.70  |
| Acetate               | <0.05 | 0.31  | <0.1  | 0.34  | <0.1  | 0.48  | 0.81  | 0.42  | 0.79  | 0.25  |
| Alanine               | 0.99  | 0.74  | 0.55  | 0.91  | 0.97  | <0.05 | <0.05 | <0.1  | <0.05 | <0.05 |
| Arabinose             | 0.84  | 0.22  | 0.75  | 0.96  | <0.1  | 0.44  | 0.78  | 0.33  | 0.85  | 0.35  |
| Asparagine            | 0.59  | 0.71  | 0.91  |       |       |       |       |       |       |       |
| Aspartate             | 0.50  | <0.05 | 0.53  | 0.62  | 0.31  | <0.1  | 0.14  | 0.14  | <0.1  | <0.05 |
| Butyrate              | 0.34  | 0.52  | 0.32  | 0.21  | 0.13  | 0.72  | 0.23  | 0.93  | 0.30  | 0.68  |
| Cholate               | <0.05 | 0.59  | 0.18  | 0.39  | <0.05 | 0.93  | 0.52  | 0.43  | 0.40  | 1.00  |
| Ethanol               | 0.29  | 0.42  | 0.27  | 0.17  | 0.91  | <0.05 | 0.65  | 0.33  | 0.11  | 0.78  |
| Formate               | 0.51  | 0.61  | 0.50  | 0.27  | 0.72  | 0.39  | 0.72  | 0.13  | 0.16  | 0.58  |
| Fumarate              | 0.10  | 0.86  | 0.30  | 0.30  | 0.25  | 0.87  | 0.69  | 0.32  | 0.48  | 0.42  |
| Galactose             | 0.14  | 0.89  | 0.89  | <0.01 | <0.05 | <0.05 | <0.05 | 0.34  | 0.10  | 0.16  |
| Glucose               | 0.14  | 0.18  | 0.66  | 0.96  | 0.74  | <0.05 | 0.16  | 0.23  | <0.01 | <0.05 |
| Glutamate             | 0.56  | 0.84  | 0.49  | 0.49  | 0.91  | 0.39  | <0.05 | 0.52  | 0.13  | 0.41  |
| Glutamine             | 0.99  | 0.92  | 1.00  | 0.83  | 0.78  | 0.10  | <0.01 | 0.44  | <0.05 | <0.01 |
| Glycine               | 0.73  | 0.98  | 0.70  | 0.74  | 0.95  | <0.05 | <0.01 | 0.47  | <0.05 | <0.05 |
| Isoleucine            | 0.99  | 0.92  | 0.77  | 0.98  | 0.98  | <0.1  | <0.05 | <0.05 | <0.05 | <0.05 |
| Lactate               | 0.38  | 0.58  | 0.32  | 0.58  | <0.1  | 0.33  | 0.80  | 0.13  | 0.95  | 0.82  |
| Leucine               | 0.62  | 0.91  | 0.89  | 0.72  | 0.88  | <0.1  | <0.05 | <0.05 | <0.05 | <0.05 |
| Lysine                | 0.98  | 0.92  | 0.55  | 0.73  | 0.21  | 0.14  | <0.01 | <0.1  | <0.05 | <0.05 |
| Methanol              | 0.95  | 0.47  | 0.86  | 0.16  | 0.52  | 0.24  | 0.14  | <0.05 | 0.18  | 0.89  |
| Methionine            | 0.69  | 0.67  | 0.62  | 0.53  | 0.77  | <0.1  | <0.1  | 0.32  | <0.1  | <0.1  |
| Nicotinate            | 0.65  | 0.39  | 0.69  | 0.34  | 0.66  | 0.94  | <0.1  | 0.90  | 0.14  | 0.46  |
| Phenylalanine         | 0.94  | 0.84  | 0.62  | 0.70  | 0.99  | 0.10  | <0.01 | <0.01 | <0.05 | <0.05 |
| Proline               | 0.81  | 0.53  | 0.85  | 0.60  | <0.77 | <0.05 | <0.05 | <0.05 | <0.1  | <0.05 |
| Propionate            | 0.87  | <0.05 | <0.05 | 0.40  | <0.05 | 0.28  | 0.54  | 0.66  | 0.65  | 0.37  |
| Serine                | 0.86  | 0.94  | 0.94  | 0.98  | 0.78  | 0.12  | <0.01 | <0.05 | <0.05 | <0.05 |
| Succinate             | 0.81  | 0.29  | 0.17  | 0.60  | 0.73  | 0.52  | 0.62  | 0.90  | 0.26  | 0.77  |
| Taurine               | 0.50  | 0.49  | 0.26  | 0.72  | 0.94  | 0.92  | 0.31  | 0.43  | 0.66  | 0.46  |
| Threonine             | 1.00  | 0.99  | 0.71  | 0.93  | 0.89  | <0.05 | <0.01 | <0.05 | <0.05 | <0.05 |
| Tryptophan            | 0.65  | 0.85  | 0.85  |       |       |       |       |       |       |       |
| Tyrosine              | 0.86  | 0.84  | 0.68  | 0.90  | 0.96  | <0.1  | <0.01 | <0.05 | <0.05 | <0.05 |
| Valerate              | 0.53  | 0.50  | 0.61  | 0.42  | 0.15  | 0.92  | 0.11  | 0.83  | <0.1  | 0.70  |
| Valine                | 0.98  | 0.99  | 0.85  | 0.95  | 0.88  | 0.13  | <0.01 | <0.01 | <0.1  | <0.05 |
| Xylose                | 0.63  | 0.17  | 0.83  | 0.99  | 0.20  | 0.57  | 0.48  | 0.96  | 0.68  | 0.46  |

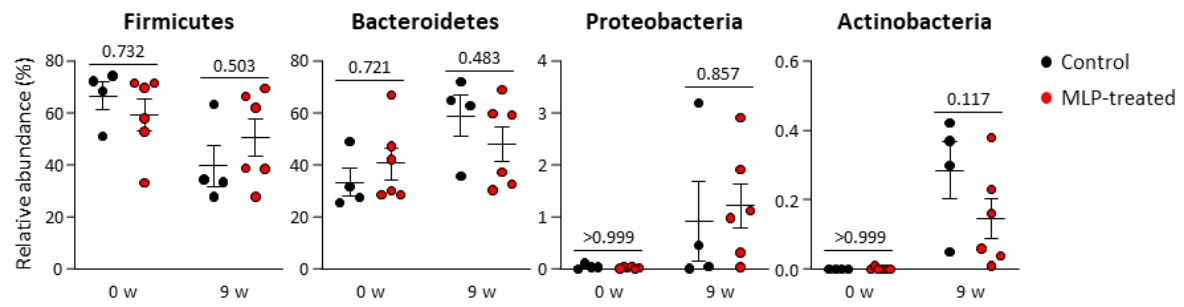

Figure S1. Comparison of the relative abundance of each phylum between the groups at weeks 0 and 9. Data are presented as means  $\pm$  SEM, statistical significance was evaluated by two-way ANOVA followed by Sidak's multiple comparison tests.  $P < 0.05$  was considered statistically significant.

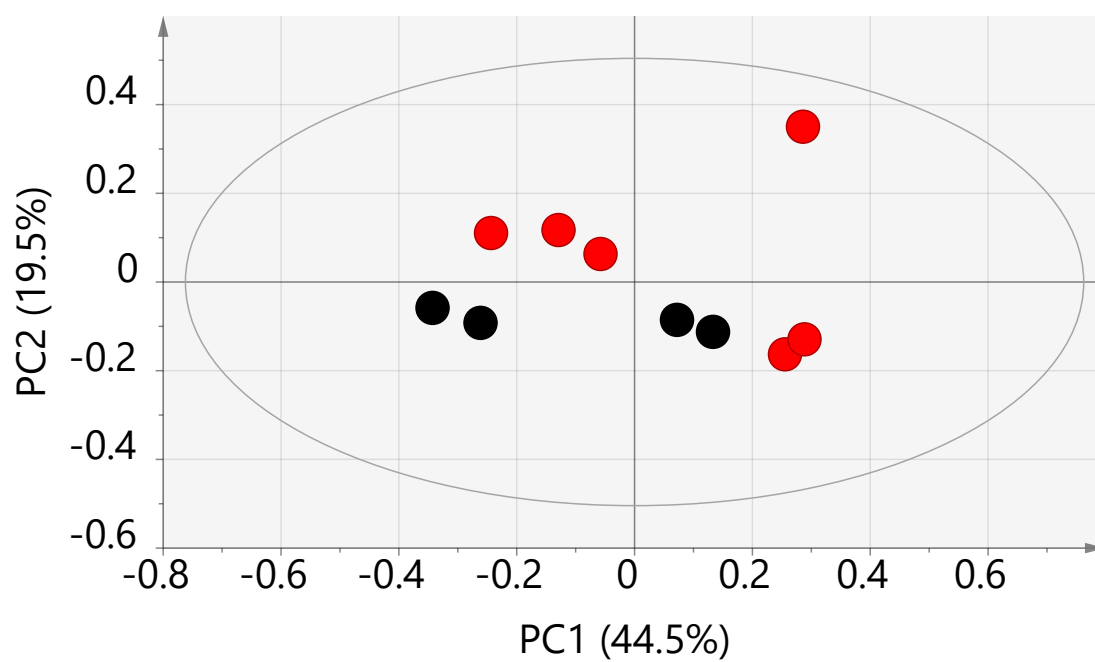

Figure S2. PCA score plot of mouse feces from the control (black) and MLP-treated (red) groups at week 9. (Three Components,  $R^2X = 0.817$ ,  $Q^2 = 0.476$ ).

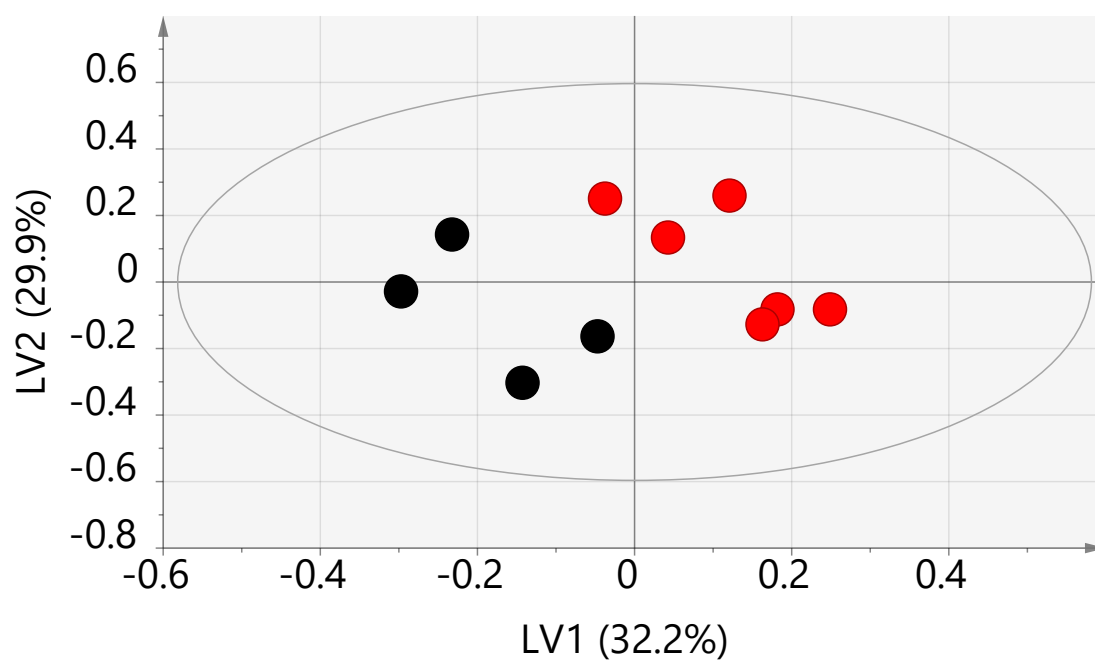

Figure S3. PLS-DA score plot of mouse feces k from the control (black) and MLP-treated (red) groups at week 9. (Two components,  $R^2X = 0.621$ ,  $R^2Y = 0.876$ ,  $Q^2 = 0.712$ ).

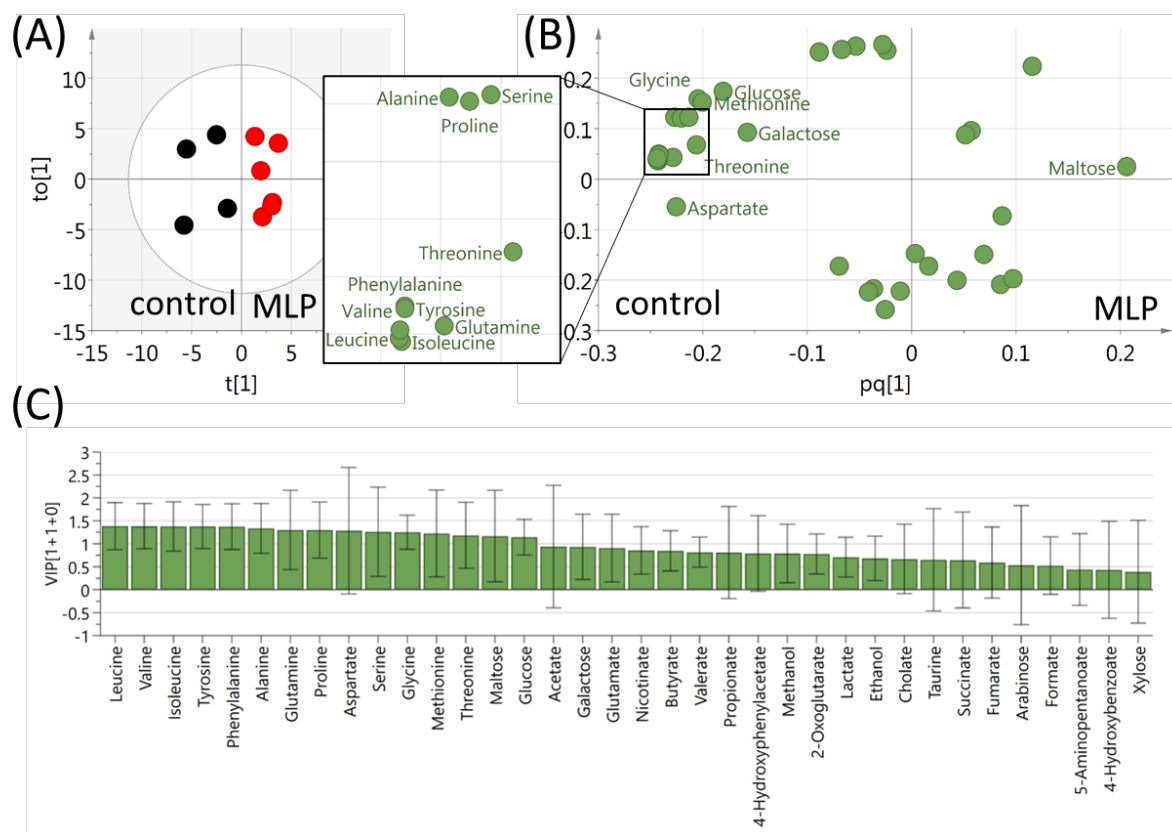

Figure S4. OPLS-DA score plot (A), loading plot (B), and VIP plot (C) of fecal samples from control (black) and MLP-treated (red) mice at week 9. (One Component,  $R^2X = 0.71$ ,  $R^2Y = 0.842$ ,  $Q^2 = 0.694$ ).



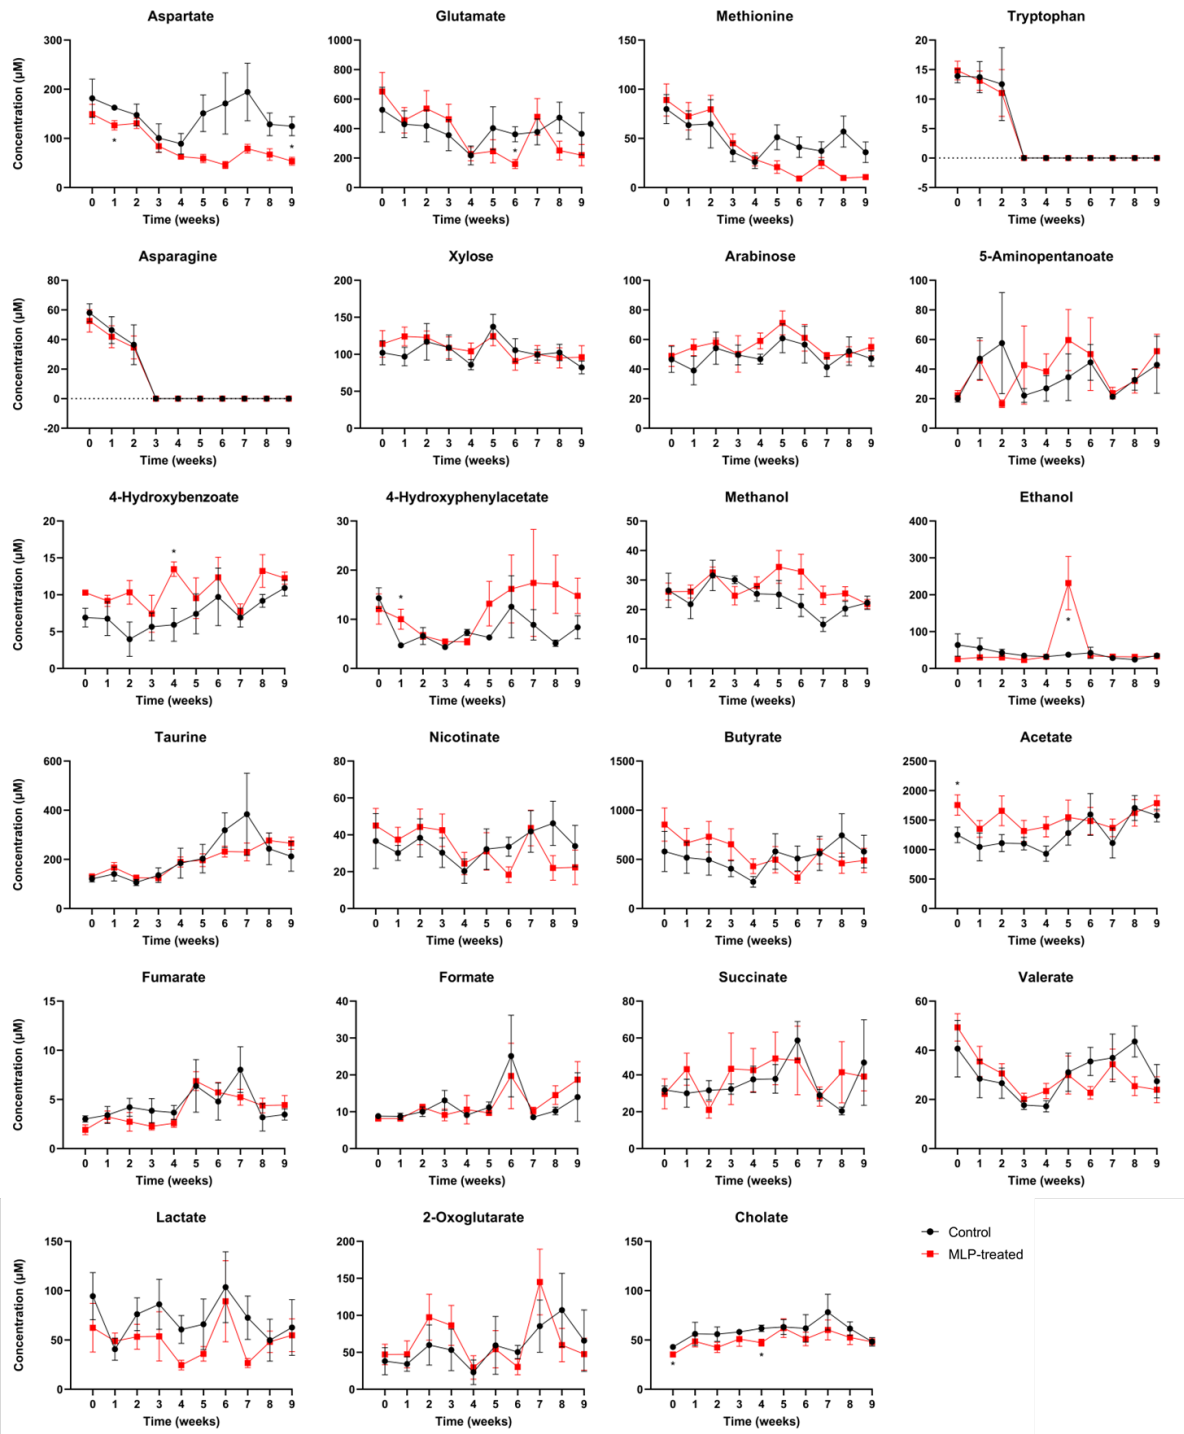

Figure S5. Time-course quantitative values of other metabolites in control (black line) and MLP-treated (red line) mouse feces. Values are presented as means  $\pm$  SEM. The asterisk indicates a significant difference between the control and MLP-treated groups ( $*P < 0.05$ ), and  $P$  values were calculated using Student's  $t$ -test.
